# Supplementary material
Source: PubMed Central journal article supplement (PMC6590689)

Supplemental Material for:

## **Ambient Air Pollution and Gestational Diabetes in New York City**

Seung-Ah Choe<sup>a,b</sup>, Melissa N. Eliot<sup>a</sup>, David A. Savitz<sup>a</sup>, Gregory A. Wellenius<sup>a</sup>

<sup>a</sup>Department of Epidemiology, Brown University School of Public Health, Providence, Rhode Island; <sup>b</sup>Department of Obstetrics and Gynecology, CHA University School of Medicine, Gyunggi, South Korea;

### **Address for Correspondence:**

Dr. Gregory A. Wellenius

Associate Professor of Epidemiology

Brown University

Box G-S121-2

Providence, RI 02912

Supplemental Table 1. Unadjusted odds ratios (OR) for gestational diabetes across quartiles or with an interquartile (IQR) increase in PM<sub>2.5</sub> and NO<sub>2</sub>

|                                     |             | PM <sub>2.5</sub>         |            | NO <sub>2</sub>           |            |
|-------------------------------------|-------------|---------------------------|------------|---------------------------|------------|
|                                     |             | Unadjusted OR<br>(95% CI) | P<br>value | Unadjusted OR<br>(95% CI) | P<br>value |
| <b>1<sup>st</sup><br/>trimester</b> | Q1          | 1.00 (reference)          |            | 1.00 (reference)          |            |
|                                     | Q2          | 1.02 (0.98, 1.07)         | 0.269      | 1.02 (0.98, 1.07)         | 0.318      |
|                                     | Q3          | 0.98 (0.93, 1.02)         | 0.292      | 1.04 (0.99, 1.09)         | 0.124      |
|                                     | Q4          | 0.95 (0.90, 1.00)         | 0.032      | 1.06 (1.00, 1.12)         | 0.055      |
|                                     | Continuous* | 0.96 (0.94, 0.99)         | 0.002      | 1.05 (1.02, 1.08)         | 0.002      |
| <b>2<sup>nd</sup><br/>trimester</b> | Q1          | 1.00 (reference)          |            | 1.00 (reference)          |            |
|                                     | Q2          | 1.04 (1.00, 1.09)         | 0.073      | 0.98 (0.93, 1.03)         | 0.369      |
|                                     | Q3          | 1.06 (1.01, 1.10)         | 0.023      | 0.99 (0.94, 1.04)         | 0.751      |
|                                     | Q4          | 1.08 (1.03, 1.14)         | 0.003      | 0.99 (0.93, 1.04)         | 0.618      |
|                                     | Continuous* | 1.04 (1.01, 1.07)         | 0.003      | 1.00 (0.97, 1.03)         | 0.911      |

\*ORs for a IQR increase in PM<sub>2.5</sub> (3.23 µg/m<sup>3</sup>) or in NO<sub>2</sub> (7.96 ppb) were calculated with logistic linear regression analysis conditional on zip code.

Supplemental Fig. 1. Directed acyclic graph of variables confounding or mediating the association between air pollutants and gestational diabetes mellitus.

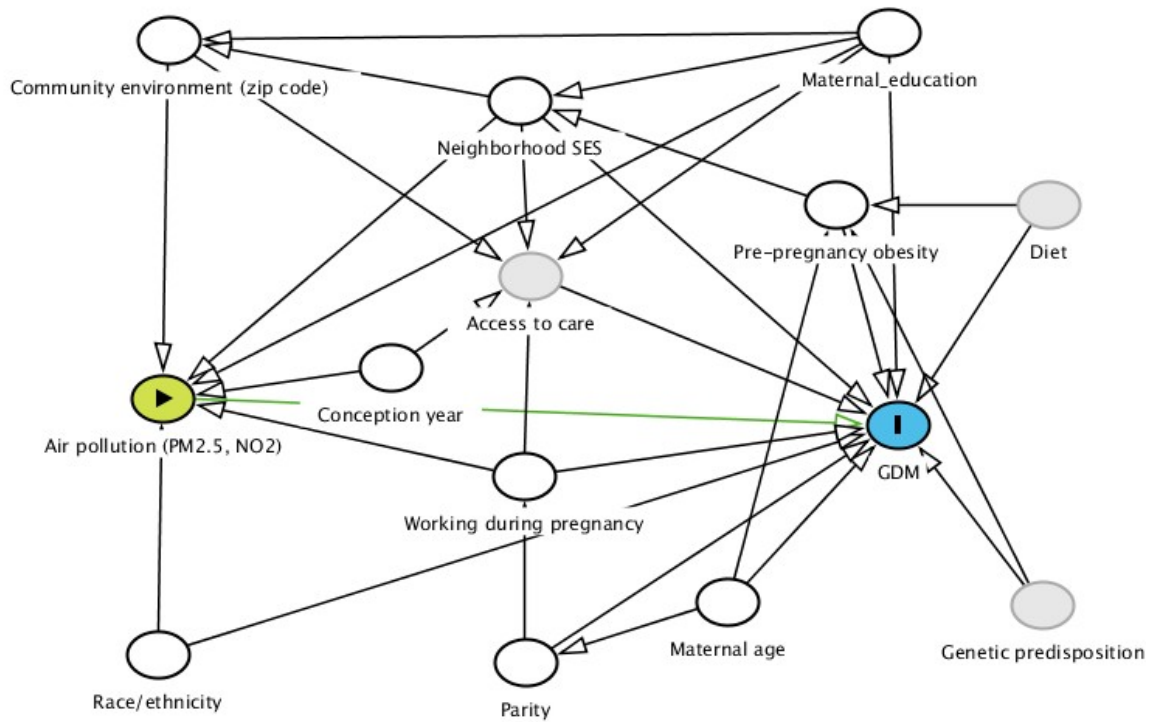

Supplemental Fig. 2. . Correlation matrix of air pollutants during each of trimesters

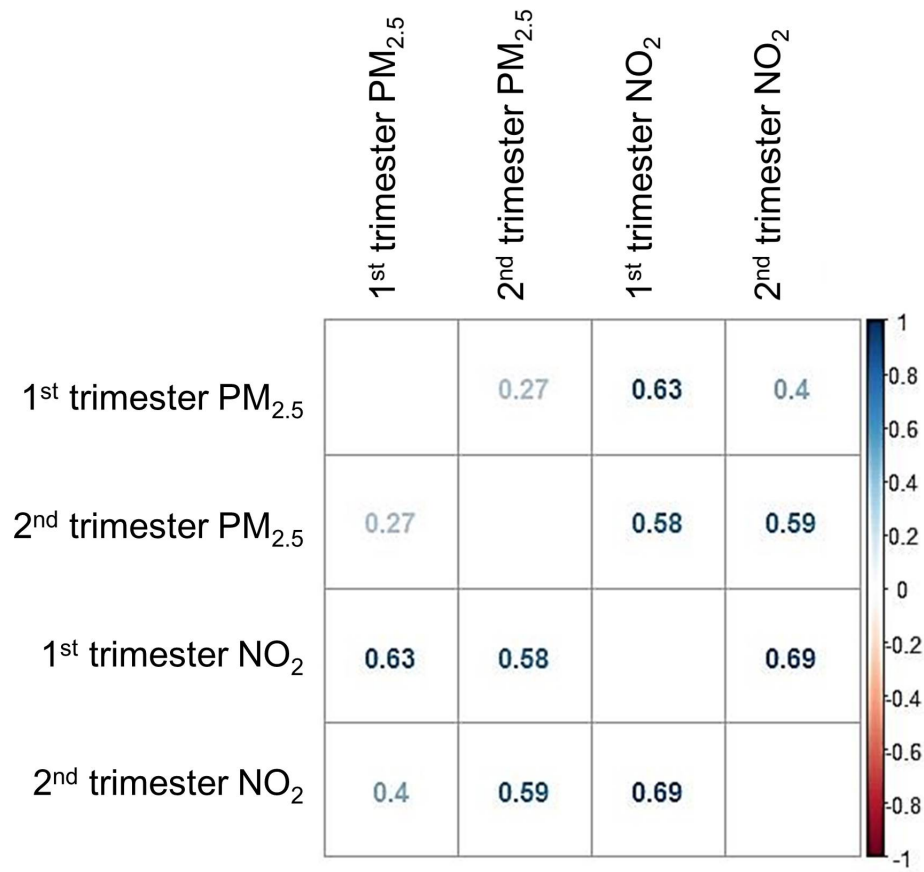

Supplement: NIHMS1530596-supplement-1.pdf [file NIHMS1530596-supplement-1.pdf]
